# Supplementary material for: Exploring the Role of Wearable Technology in Sport Kinematics and Kinetics: A Systematic Review
Source: Sensors (Basel). 2019 Apr 2;19(7):1597. doi: 10.3390/s19071597 (PMC6480145; doi:10.3390/s19071597)
Supplement: Supplementary file 1 [file sensors-19-01597-s001.xlsx]

## Sheet: Sheet1
	1	2	3	4	5	6	7	8	9	10	11	12	13	14	15	16	17	18	19	20	21	22	23	24	25	26	27	28	29	30	31	32	33	34
	Akins et al. (2015)	Bächlin et al. (2012)	Blair et al. (2018)	Chardonnens et al. (2013a)	Chardonnens et al. (2013b)	Chardonnens et al. (2014)	Fantozzi et al. (2016)	Gandy et al. (2018)	Gawsalyan et al. (2017)	Guo et al. (2010)	Jacob et al. (2017)	Kiernan et al. (2018)	Kim et al. (2016)	King et al. (2009)	Koda et al. (2010)	Krüger et al. (2009)	Lapinski et al. (2009)	Lee et al. (2017)	Li et al. (2016)	Makhni et al. (2018)	Meamarbashi et al. (2010)	Mitsui et al. (2015)	Mocera et al. (2018)	Munz et al. (2013)	Nakazato et al. (2011)	Nakazato et al. (2013)	Patterson et al. (2010)	Philpott et al. (2014)	Reenalda et al. (2016)	Shepherd et al. (2017)	Taha et al. (2016)	Wang et al. (2018)	Wang et al. 2016	Wood et al. (2014)
Aim	Assess test-retest reliability and concurrent criterion validity of a kinematic assessment using the instrumented soccer equipment during athletic maneuvers in the laboratory and field'	Use the wearable SwimMaster system and related Swim Master software to evaluate performance and technique parameters in swimming (body-balance and body-rotation measurements)	Examine 'the concurrent validity of a IMS (Xsens MVN system) for measuring lower extremity and pelvis kinematics in comparison to a Vicon motion analysis system (MAS) during kicking' in Australian football, soccer, and the rugby codes	Evaluate the validity and sensitivity of a wearable inertial sensors-based system 'to measure the orientation of the lower-body segments (sacrum, thighs, shank) and skis during the entire jump sequence' compared to the slope inclination and reference values in literature	Assess the inter-segment coordination of the shank-thigh and thigh-sacrum pairs using the continuous relative phase (CRP)'	Design and assess a method to determine the dynamics during take-off and stable flight using IMUs' in ski jumping	Assess the 3D joint kinematics of the upper limbs during swimming using IMMUs by developing an appropriate adaptation of the protocol proposed by Cutti et al. (2008).'	Investigate 'the use of inertial sensing technology as an indicator of asymmetry in horse riders, evidenced by discrepancies in the angle of external rotation of the hip joint'	Investigate the use of MARG sensors to analyze upper limb motion of bowlers in cricket	Find out the characteristics of players' performance in table tennis block by quantitative analysis' using accelerometers	Develop 'a wearable sensor system to identify the different types of badminton hand grip that is used by a player during training'	To combine accelerometer-based methods developed to estimate stride parameters (Lee et al., 2010) and peak vGRF (Neugebauer et al., 2014) to quantify loading profiles throughout entire runs of elite track athletes. Moreover to investigate the relationship between traditional metrics (number of strides, peak vGRF magnitudes) and a cumulative loading metric and running-related injury	Detect a football kick from inertial measurements using a wearable sensor	Validate a Body Sensor Network (BSN) consisting of inertial sensors against an optical tracking system to monitor the kinematics of the femur and lower back in rowers	Propose the measurement method of three-dimensional (3D) movement of forearm and upper arm during pitching motion of baseball using inertial sensors without serious consideration of sensor installation'	Assess the accuracy and application of inertial measurement suit and bilateral insole measurement system in a real snowboarding environment compared to an optical video-based system and a force plate	Validate an array of wireless inertial measurement units against an optical tracker to measure pitcher and batter kinematics in baseball	Analyze the motions of short- and middle- turns in skiing using a wearable motion capture system to investigate injury risk	Measure trunk rotation in freestyle swimming using a wearable feedback system	To assess the precision of a new wearable device in detecting medial elbow torque during the pitching motion in competitive baseball pitchers and to determine the differences in torque across pitch types and thrower demographic characteristics'	Determine whether there are any differences in the kinematics and kinetics of the dominant and non-dominant legs of young, male university soccer players'	Propose a support system for improving golf swing by using wearable sensors'	Identify the main parameters that characterize the proper movement technique' using a tri-axial accelerometer and a load cell to measure acceleration and force	Reveal the possibilities and limitations of inertial sensors to assess the motion of the rider's pelvis in walk, trot and canter, with particular attention to repeatability'. Derived from this, aims were '1) to characterize the motion of the pelvis in different gaits; 2) to evaluate the repeatability of the method proposed; and 3) to verify its potential to objectively distinguish between the kin…	1) Provide reference data for the vertical component of the ground reaction forces vGRF) during alpine skiing measured by the pressure insole (PI) and portable force plate (FP) systems 2) and to analyze whether the differences in the vGRF measured by the PI and FP depend on a skier's level, skiing mode and pitch'	(1) Compare the force application point (FAP) calculated by a portable force plate system and the center of pressure (COP) calculated by a pressure insole system, and (2) to assess whether any statistical differences between FAP/COP characteristics were influenced by the skiing modes, skiers' skill levels, or pitch of the slope'	Quantify rider ability in show jumping using body-mounted IMUs' and 'compare rider balance and movement when riders of different experience jump an experienced horse and an inexperienced horse'	Investigate the capability of an IMU in providing relevant and sufficiently accurate information for a sprint start performance'	To demonstrate the possibility of analyzing three dimensional (3D) running mechanics continuously, by means of inertial magnetic measurement units, to objectify changes in mechanics over the course of a marathon'	Evaluate the efficacy of a single wireless inertial measurement unit (IMU) sensor to monitor shooting kinematics, in terms of forearm angle at ball release'	Quantify the performance of an archer by studying the their arm movement while shooting using a recurved bow	Assess the skill level of volleyball spikers using a wearable sensing device (WSD)	Provide coach with a low cost, portable device that can monitor the training performance of professional athletes throughout the training process on canoe sprint'	Investigate the feasibility of using peak positive acceleration (PPA)-generated audio biofeedback to reduce PPAs while running'
Sports studied	Football	Swimming	Australian football, football and rugby	Skiing	Skiing	Skiing	Swimming	Equestrian	Cricket	Table tennis	Badminton	Athletics	Football	Rowing	Baseball	Snowboarding	Baseball	Skiing	Swimming	Baseball	Football	Golf	Nordic walking	Dressage riding	Skiing	Skiing	Show jumping (horse riding)	Athletics	Running	Netball	Archery	Volleyball	Canoeing	Running
Sample size	12	18	30	22	33	22	8	7	not reported	16	1	9	5	6	5	1	9	7	4	37	15	Not reported	1	2	20	15	4	5	3	4	2	10	2	9
Participants demographics (e.g. population type, age, gender, mass, height)	Healthy male football players; recreational level; right-footed; age - 26.3±4.1 years; height - 178.3±7.2cm; body mass - 78.5±7.0kg	Elite, recreational and occasional swimmers (categorized by training and participating in competition)	Male athletes (Australian football n=10, football n=10, rugby league and rugby union n=10); age 22.5±3.0 years; height - 181±5.7cm; body mass - 79.6±6.5kg	Male athletes from junior to world cup level; age - 19±5 years; body mass - 60±9kg	Male performance athletes (20 junior, 9 Continental-cup, 4 World-cup); age - 19±4 years; height - 172±8cm; body mass - 58±8kg	Male athletes from junior to world cup level; age - 19±5 years; body mass - 60±9kg, height - 174±9cm. Grouped as Group 1 - athletes jumping more than 80m and; Group 2 - athletes jumping between 65 and 80m	Male swimmers; age - 26.1±3.4 years; height - 182.5±8.8cm; body mass - 77.0±10.1kg	6 female and 1 male riders; age - 29±11 years; height - 161.8±6.75cm; body mass - 62±6.7kg	Bowlers from leading cricket academy in Sri Lanka	Eight female, eight male, amateur table tennis players of different skill levels (classified as advanced, intermediate, and fresh by assessment from two coaches)	Badminton coach	NCAA Division 1 male runners competing in distance events; 3 injured, 6 uninjured; age - 18.7±1.0 years; weight - 629.37±71.35N; height - 178.4±4.6cm	Not reported	5 novice rowers were used for validation purpose and 1 experienced rower for part 2 of the study	Healthy male volunteers: height: 1.72±0.05m; weight: 62.5±15.0kg; age: 22.2±1.3 years. Two subjects have baseball career for three years as outfielder	Experienced recreational snowboarder; 28 years; 73kg	Four professional baseball pitchers; five professional baseball batters	Male certified ski coaches; age - 35.3±4.9 years; height - 177.9±1.3cm; body mass - 85.9±3.0kg	Recreational swimmers (with different levels of freestyle swimming skills)	Male competitive baseball pitchers; age - 16-20 years; height - 174-196cm; BMI - 17.5-32.1	Right-leg dominant male university football players; age - 20-22 years; body mass - 68.1±8.7kg, height - 174.4±7.9cm	Beginner and experienced players	27-year old man who had completed a Nordic walking training course and has experience in several ski disciplines and trail running	Non-professional female dressage riders each with over 30 years of riding experience (39 years old, 172cm and 80.9kg; 46 years old, 178cm and 67.4kg)	Ten expert level skiers (8 male and 2 female): age - 25.7±3.9 years; height - 1.79±0.09m; body mass 75.7±12.0kg; ten male intermediate level skiers: age - 23.6±3.0 years; height - 1.77±0.07m; body mass - 71.7±5.1kg	Seven expert and eight intermediate level skiers	Two novice (both female) and two experienced riders (one male and one female) ('classified based on their competition experience as evidenced by Show jumping Ireland certificates')	Male amateur university athletes: weight: 81 ± 10.6kg; age: 20.6 ± 0.5 years	Well trained male distance runners; age - 38.7±8.2 years; height - 182±2.4cm; body mass - 73±3.7kg	Female elite (state-level) netballers; age - 22.5±2.9 years; height - 1.84±0.05m; body mass - 78±2.74kg (three were right-handed and one was left-handed)	Male university level archers; body mass - about 70kg; height - about 170cm	Right-handed male volleyball players (three amateurs, three sub-elites and four elites): age: 21-29 years; height: 179-194cm; body mass: 70-94kg	Professional athletes	Healthy runners (6 female, 3 male) from a university population of recreational runners; age: 20±1.5 years; height 170.2±8.7cm; mass: 59.1±8.2kg
Tasks conducted	Participants took part in two sessions, 1 week apart. 3 athletic maneuvers in the laboratory: drop landing, drop jump, and stop jump. In a climate-controlled indoor practice facility with FieldTurf 2 soccer-specific maneuvers were performed: jump header and moving header. Three trials were performed of each with 60s rest between each trial	Swim technique evaluation (12 participants) - 5 lengths varying leg kicks and body rotation: normal leg kicks and good body balance, weak leg kicks to provoke bad body balance, normal body rotation, minimal body rotation and as much body rotation as possible. Evaluation of the automatic performance measurement (8 participants)- 7 × 50 m Stroke Efficiency Test as described by Maw and Volkers	Participants performed 20 kicks across four conditions specific to their football code (Australian football: 20m drop punt kicks, 40m drop punt kicks, maximal punt kicks; 20m kicks 'on the run'; football: 12m instep kicks, 12m inside kicks, 20m instep kicks, maximal instep kicks; rugby: 20m drop kicks, 20 place kicks, 40m place kicks, maximal place kicks) in a randomized order	Two or three jumps were recorded on the HS-117 plastic jumping hill of Einsiedeln (CH) during daily training	Participants performed between 1 and 3 jumps on the HS-1122 jumping hill of Einsiedeln (CH) during regular training	Two or three jumps were recorded on the HS-117 plastic jumping hill of Einsiedeln (CH) - table angle = 10.5°	Simulated front-crawl and breaststroke swimming was performed by the participants at a self-selected speed with lower limbs against a 70cm high plastic rigid box (and held in place by a conductor). Twenty stroke cycles were performed for each style	A runway (1m width, 30m in length) and 15m circle were marked out. Riders performed a rising trot, followed by a circle on each rein, then walked, rested and repeated	Bowlers performed a few deliveries	Participants were required to block 100 balls with the same skill, returning to the original position after each receive. This position was with the upper arm of the racket hand close to the body and the forearm parallel to the table. In blocking the forearm was moved straight out to block the ball with the racket.	Coach performed five different types of racket grip while wearing the Hand Monitoring Module (HMM)	Training runs over a 60-day period as part of schedules provided by coaches	Participants kicked a ball placed 2 meters ahead from a start line at intervals of 10 seconds for 5 minutes, 3 times	Row on the York Inspiration Rower. Experiment divided in two parts: part 1 validation of the system during rowing; part 2: use the system to differentiate rowing technique (good technique, and poor such as slideshooting and over-leaning)	Each participant performed a pitching motion towards a protection net 4m away several times as fast as possible	Participant performed a single test run (360° indie grab) in a prepared snowboard park (spark jump size approximately 8m). 10 trials with 10 consecutive squats of a test person equipped with snowboard boots, bindings, and a board similar to the equipment used in the field test were analyzed to validate portable insole system in a lab environment with a force plate.	Ten fastballs were thrown by each pitcher off a regulation pitcher's mound; batters performed five free swings and then hit a ball of a tee for five swings	Participants performed both short- and middle-turns on a ski slope (angle 17-19° and length of 570m)	4x25m freestyle swimming at a distance pace in a no-feedback and vibratory feedback experiment (conducted on different days). Three repeated tests for each scenario with 15-minute rest between each test	Pitchers threw from mound towards a plate at a distance of 18.4m. Pitching protocol included: 8 fastballs, 8 curveballs an 8 change-ups (random order). Pitchers threw at maximum effort with a rest of 30-60 seconds between pitches	Players performed 4 instep kicks on each leg at an approach angle of 45° from 3-4m distance from the ball. Kicks were 5m away from an empty goal. They were instructed to kick as hard as possible. Performed 5 times on dominant leg (1-minute rest), then 5 times on non-dominant leg	Performed golf swings	The participant performed a Nordic walking session (mainly on plane fields)	Each rider rode three trials with a 15 minute rest between each. 'Each trial consisted of two laps of walking, three laps of rising trot, sitting trot and left-led canter respectively in an indoor riding hall (40 x 20m)'	Participants performed 10 double turns for two skiing modes (high and low dynamic) on two different slope pitches (15° and 23°). These were performed randomly and repeated twice on each pitch	Participants performed two separate runs on a slope (upper section had a pitch of 23° and lower section had a pitch of 15°) with 10 double turns on each pitch for two skiing modes. Skiing modes: high and low dynamic	Each rider performed five jumps over a 1.2m upright fence in an indoor arena on an inexperienced horse and then on an experienced horse	Athletes performed five sprint starts as they would in a race, with recovery between each trial	Participants completed a marathon	Protocol included shooters performing 10 shorts directly in front of a netball hoop (height 3.05m) at a distance of 1.6m, 2.45m and 3.2m, totaling 30 shots. An additional 10 shots were performed without the IMU at 2.45m	Each archer shot three frames of six arrows each to a target 70m away	Participants performed 10 cross-court spikes using a straight-ahead spike motion towards an 'x' position.	Athletes paddled a canoe in a straight line for 100m at a self-selected speed and 250m at a competitive speed	Participants ran for 25 minutes, with five minutes each at different running conditions: warm up (control), biofeedback, no feedback, biofeedback, no feedback. During periods of biofeedback, 'participants were instructed to (1) run without any beeps at all or (2) keep the pitch of the beep as low as possible'
Measuring system used	Soccer turf shoes and shin guards were instrumented with two magnetic field angular rate and gravity (MARG) sensors (x-IMU, x-io Technologies Limited, UK) containing a 3D linear accelerometer (± 8 g), 3D angular rate gyroscope (± 2000°s–1), and 3D magnetometer (± 8.1 G). Gold standard: 8-camera Vicon system	SwimMaster - SwimRecorder (motion measurement) and Swim-Feedback-System (user feedback), SwimRecorder (3-axes accelerometer sensor, micro-controller, 1 GB of flash memory and a rechargeable battery). visual feedback swim goggles (AVisual), the tactile (ATactile) and the acoustic (AAudio) feedback devices. Data stored for off-line processing, data recording up to 48hours	MVN Link IMS (Xsens Technologies, B.V., Enschede, The Netherlands) consisting of 17 inertial sensors (containing a 3D accelerometer (scale: ±160 m.s-2, noise: 0.003 m.s-2/√Hz), 3D gyroscope (±2000 °/s, 0.05°/s/√Hz) and 3D magnetometer (±1.9Gauss, 0.15m Gauss/√Hz), a transmission pack and battery zipped into a compression suit. Gold standard: 12 camera Vicon motion capture system	Seven wireless IMUs (Physilog, BioAGM, CH) including a 3D gyroscope (±1200deg/s), a 3D accelerometer (±10 g) and a datalogger.	Five IMUs (Physilog, BioAGM, CH) including a 3D gyroscope (±1200deg/s), a 3D accelerometer (±10 g) and a datalogger.	Seven wireless IMUs (Physilog, BioAGM, CH) including a 3D gyroscope (±1200deg/s), a 3D accelerometer (±10 g) and a datalogger.	An IMMU system (Opal, ADM) consisting of 7 units. Gold standard: 7 camera stereo-photogrammetric system (SMART-DX 7000, BTS Bioengineering)	Xsens MVN (MoCap) system - full body lycra suit embedded with 17 IMU sensors (incorporating 3D accelerometers, gyroscopes and magnetometers)	Three MARG (magnetic, angular rate and gravity) sensors	A body sensor network (BSN) node board containing a 3-D accelerometer (SCA3000 from VTI), a low-power microprocessor (MSP430 from TI), a radio transceiver (nRF905 from Nordic), a memory IC, a power regulator, and some affiliated discrete components. The BSN node board was 23mm in diameter. Wireless data transmission, signal transmission more than 100m	Flex sensor by Spectra Symbol (Salt Lake City, UT, USA) on thumb, index and middle fingers contained in HMM (Hand Monitoring Module). HMM consists of sensor, battery (two single NiMh batteries with a capacity of 500 mA/hour rated at 1.5V per cell) and microcontroller (Arduino Nano equipped with a 10-bit Analogue-Digital Converter).	Activity monitor with tri-axial linear accelerometer (ADXL345 Analog Devices, Norwood, MA) ±8 g	Wearable sensor consisting of a tri-axis accelerometer, tri-axis gyroscope and tri-axis magnetometer. Video camera to compare phases of the task	BSN node and inertial sensors (3-axis accelerometer (ADXL330; Analog Devices) and dual-axis gyroscope (IDG 300; InvenSense)). The BSN main board consists of a micro controller (TIMSP430F149), radio communications (Chipcon CC2420, an IEEE 802.15.4 compliant chipset), and 512KB flash memory (Atmel AT45DB041B). Gold standard: BTS Bioengineering BTS SMART-D system	3D sensor consisting of two kinds of accelerometer (ADXL 193 Max 120 G, ADXL320, Max 5G)and two kinds of gyroscope (Microstone MG3-01 Ab Max 4000 deg/s, Murata ENC-03M Max 300 deg/s). Gold standard Vicon Motion capture system	Full body IMS (Moven, Xsens Technologies, Enschede, The Netherlands) consisting of 16 sensor units (including gyroscopes, accelerometers and magnet field sensors) and two transmission units. Bilateral insole measurement system (T&T Medilogic, Germany) consisting of two insoles (each with 64 pressure sensors), two amplifiers, a wireless data transmission unit and data logger. Differential GPS (DGP…	SportSemble nodes (IMUs) consisting of three single-axis accelerometers (±120 G), three single-axis gyroscopes (12,000°/s), a 3-axis accelerometer and a digital compass (8G). The battery is a 145mAh lithium polymer rechargeable that was seen to continuously power a node for up to 3 hours of use. On-board microcontroller with 116 kB on-board flash memory (allowing each node to store around 11 seco…	MVN wearable motion capture system (Xsens Technologies, Enschede, Netherlands) with 17 inertial sensors; Pedar-X in-shoe foot pressure measurement system (Novel GmbH, Munich, Germany) with 85-99 pressure sensors	"ISWIM" system - 9-DOF inertial sensor MPU-9250 (InvenSense, USA) and microprocessor ATmega2560 (Atmel, USA); The sensor full-scale range is ±2g with a scale factor of 16384LSB/g. Professional stopwatch (AutoCoach, ACS1001) is utilized in this experiment for providing reference timing results.	Elbow torque-measurement device (ETD) containing gyroscopic sensor with an accelerometer (Motus Global, Massapequa, NY) placed in a wearable sleeve	Sensor module and data logger (Accelerometers - Freescale Semiconductor, Arizona, USA) mounted on shin guard (Meamarbashi, 2009) Data logger – built in tri-axial accelerometer consisting of a dual-axis (X-Y) and mono-axial (Z) accelerometers, ultra-high speed microcontroller, 32 MB Multimedia Card (MMC), built in tri-axial accelerometer (+/-40 gravity and 16-bit A/D converter); Sensor module – tw…	Four wearable sensors (TSND121 from ATR-Promotion), smartphone for feedback	tri-axial accelerometer (ADXL345, Analog Devices), GPS (MTK3339, MediaTek, Hsinchu, Taiwan), load cell (KM26z-500N, ME-Meßsysteme GmbH, Hennigsdorf, Germany), heart rate monitor (Pulse sensor Amped, Pulse Sensor), micro SD cards and ATMEGA 328P microcontroller (Microchip Technology Inc, Arizona, USA)	Two 6 DOF inertial sensors (MTx orientation tracker; Xsens Technologies, BV, An Enschede, The Netherlands) synchronized with a 3D wireless accelerometer (AG, RFTD-A01; Myon AG, Baar, Switzerland) and a camcorder (Exilim Pro EX F1 model, Casio, Tokyo, Japan)	Pedar PI and data logger (Pedar, Novel, Munich, Germany). Gold standard: Two portable force plates (Kistler, Winterthur, Switzerland)	Pedar Pressure Insole System (Novel, Munich, Germany). Gold standard: Two pairs of portable force plates (Kistler, Winterthur, Switzerland)	Four Xsens MTx (Enschede, Netherlands) sensors were used - three to measure rider acceleration and the fourth to measure horse movement.	wireless IMU consisting of a 3-axis accelerometer and 3-axis gyroscope developed within Loughborough University. Gold standard: 14 Vicon T-Series cameras and two Kistler force platforms	8 Wireless IMMUs (MTw, Xsens Technologies, B.V., Enschede, The Netherlands) containing a 3D accelerometer, (scale: 7160 m/s2, noise: 0.003 m/s2/√Hz, internal sampling rate: 1800 Hz), a 3D gyroscope (71200 deg/s, 0.05 deg/s/√Hz, 1800 Hz) and a 3Dmagnetometer (71.5 Gauss, 0.15 mGauss/√Hz, 120 Hz). Running velocity and distance covered were recorded simultaneously throughout the race using a GPS ena…	IMU sensor (SABELSense, Griffith University, Nathan, Australia) including a ±7 Gauss 3DOF magnetometer, ±2000°/s 3DOF gyroscope and ±16g 3DOF accelerometer. Gold standard: 10 camera Vicon motion capture system	Accelerometers	IMU containing a nine-axis MEMS motion sensor (acceleration range 16g; MPU9250 (TDK InvenSense, USA); ATmega328 (Microchip, USA) was adopted as the micro controller unit (MCU), which communicates with the motion sensor and stores the recordings to the microSD card. sensor nodes, a high-speed camera and a computer for data collection, motion review, and data analysis respectively. Feedback system	Wireless receiving node and twenty IMU nodes (single-axis analog gyroscope (±500◦ /s, Sensitivity:0.5mV /◦ /s%, Bandwidth:140Hz), dual-axis analog gyroscope and 3-axis accelerometer (±6g, Sensitivity: 330mV/g, Bandwidth: 550Hz) ). The IMUs also have a flash memory which can save the raw data when the oarsmen are far from the recording station. measurement node work more than 6 hours	A wireless, tri-axial accelerometer (G-Link-LXRS: Lord Microstrain, Williston, VT)
Data acquisition/sampling	Sampling frequency of 256Hz	Acceleration signals converted by 10 Bit A/D converter. Sampling frequency of 256Hz	Data sampling of the system at 240Hz	Signal was low-pass filtered at 100Hz and recorded at 500Hz	Angular velocities and accelerations were low-pass filtered at 100Hz and recorded on a memory card at a sampling frequency of 500Hz	Signal was low-pass filtered at 100Hz and recorded at 500Hz	Sampling frequency of 128Hz	Data captured wirelessly via Bluetooth by MVN Studio software package at a sampling rate of 120Hz	Sampling rate of 350Hz to microcontroller	Signal sampling rate of 25Hz	HC-05 Bluetooth module used to create wireless communication link between HMM and host PC (operating at 38400 bps)	Atmega328 microcontroller, micro SD card, accelerometer sampling rate 48.4-52.4Hz	Data sampled at a rate of 100Hz wirelessly to a PC	Data collected from sensor nodes at a sampling rate of 50Hz and transmitted wirelessly to a base station	Output recorded on a laptop with a sampling frequency of 1000Hz	Sample frequency of 120Hz - wireless	Output from the 3 analog High-G accelerometers were stored on onboard microcontroller at a rate of 1kHz, the low-G accelerometer was sampled at 100Hz and the compass at 10Hz.	Sampling frequency of 100Hz	Mini SD card recorded sensor data, sampling frequency of 10Hz	Recorded by ETD and displayed and stored by the accompanying smartphone application by the manufacturer.	Data saved onto memory card at 130Hz	Data wirelessly transmitted via Bluetooth to a smartphone, sampling period of 20ms	Data was stored on micro SD card at a sampling rate of 50Hz	Sampling rate of 100 Hz	Sampling frequency of 100Hz for both systems used	Sampling frequency of 100Hz for both systems	Data was acquired wirelessly by a laptop computer using Bluetooth	Data collected at a rate of 50Hz	Data transferred wirelessly to a base station (Awinda Master) mounted on the handlebars of an accompanying cyclist, sampling frequency of 60Hz	Data logged onto a micro SD card, sampling rate of 100Hz	Wireless data transfer rate using Bluetooth at a sample rate of 15Hz	Raw data recorded onto a MicroSD card	Raw data uploaded to PC by wireless transceivers at a sampling rate of 100Hz	Data was collected with a sampling rate of 612Hz using a LabVIEW program
Participant setup (e.g. position of the sensors, fixation method)	One MARG sensor was placed on shin guard and the other to an instrumented football turf shoe	Four sensors mounted to: upper back, lower back, left wrist, right wrist. Wrist sensors are wristwatch like. Lower back sensor mounted on hip with elastic stretch band. Upper back sensors mounted between shoulders with elastic bands combined to harness. Visual swim feedback goggles	Sensors were placed on the shanks (medial surface of the tibias), thighs (lateral side above the knees), pelvis (middle of both the posterior superior iliac spines), shoulders (middle of the scapula spine), upper arms (lateral side above elbow), forearms (lateral side of wrist), hands (posterior side), sternum, back of the head, feet (lateral side of player's boot inferior to the malleolus)	Five IMUs were attached to the sacrum, thighs (laterally at the middle of the thigh length) and shanks (medially at the middle of the shank length) using an underwear suit. Two IMUs were attached to the skis behind the bindings	Sensors were attached bilaterally to the thigh and shank segments and to the sacrum using an underwear suit	Five IMUs were attached to the sacrum, thighs and shanks using an skin-tight suit. Two IMUs were attached to the skis behind the bindings	IMMUs were attached to wooden plate clusters and fixed onto the swimmer's body - to the thorax, humerus (both sides) , forearm (both sides) and hand (both sides)	Participants wore a lycra suit embedded with IMUs	Three MARG sensors mounted to the upper arm, forearm and wrist	BSN node attached to the front of the forearm of the racket hand	Participant wore hand monitoring module (HMM) and performed five different grip types (forehand, backhand, panhandle, thumb and bevel)	Monitor was fixed to the lateral right iliac crest using a neoprene belt before each training session	Sensor attached to the back a kicking leg's ankle	Sensor nodes attached to sacrum, thoraco-lumbar junction and left femur	Two sensors fixed to the upper arm and forearm using Velcro fastening	Sensor units were fixed to the boots, lower legs, upper legs, pelvis, shoulders, head, upper arms, forearms and hands. The insoles were placed inside the snowboard boots	IMUs were attached to the chest, upper arm, forearm, wrist and bat during the free swings. The IMU sensor on the bat was then moved to the waist for the tee swings. These were fixed using standard body tape	Participants wore the MVN suit and pressure sensors were placed inside the ski boots. Power bank and signal transmitters were fastened on the back	"ISWIM" system placed on swimmer's sacrum and feedback units were placed on left and right shoulders	Sensor placed in wearable sleeve and positioned on the proximal forearm, with sensor 1.5 inches distal to the medial epicondyle	Shin guard was fixed to the middle-front aspect of the shank with elastic bands	Sensors attached to left wrist, solar plexus, right knee and head	The tri-axial accelerometer was oriented on the poles and the load cell was integrated into the pole	One sensor was attached to the rider's pelvis and the other was 'fixed centrally on the saddle girth beneath the horse's sternum'. The accelerometer was placed on the left cannon bone of the front limb (identifying the beginning and end of a stride). All sensors were attached with adhesive tape.	Pressure insoles were placed in each ski boot and the Novel data logger, battery pack and trigger switch were carried on a belt attached to the Kistler backpack. One portable force plate was mounted under the toe binding and the other under the heel binding, with amplifiers, power supply, supply box and data loggers also carried in a backpack	Pressure insoles were placed in each ski boot and the data logger, battery pack and trigger switch were carried on a belt attached to the Kistler backpack. One pair of portable force plates was mounted on each ski (one plate under the toe binding and the other under the heel binding) A backpack was worn containing the amplifiers, power supply box and data loggers.	Three Xsesns MTx sensors were attached to the back of the helmet, upper arm and mid-thigh. These were attached using Velcro straps or elastic tape. A fourth sensor was fitted to the front of the saddle with a Velcro strap threaded through the D-rings.	IMU positioned on athlete's lower back	Participants wore 8 IMMUs on the sternum, sacral bone, tibial tracts (halfway between the iliac crest and lateral condyle of the tibia), lower third of the medial surface of the tibia and on the feet. Sensors were attached using double-sided adhesive skin tape and fixed with kinesiotape. Foot sensors were fixed with foot clips laced on the shoes and secured with tape	Participants wore one IMU sensor that was positioned superior to the distal radioulnar articulation and secured with a Velcro strap	One accelerometer was strapped to each arm	Sensor worn on wrist	Between the two athletes, four measurement nodes were attached to the upper arm, two to the forearm, two to the support leg, two to the paddle, two to the chest, two to the abdomen and one to the canoe in the sagittal plane or the lateral side of body parts	The accelerometer was taped to the anteromedial aspect of the left distal tibia
Data processing (e.g. filter used for the signal)	Not reported	Raw acceleration signal was low-pass filtered using a 2nd order Butterworth filter, cut-off frequency 0.01	Sensor data processed with Xsens proprietary algorithms (Xsens Kalman Filter) and filtered using the Lxsolver in MVN Biomech Studio	Acceleration signals were filtered using a low-pass median filter with a window size of 1s	Not reported	Acceleration signals were filtered using a low-pass median filter with a window size of 1s	Data was filtered using a second-order Butterworth digital filter with a cut-off frequency of 5Hz. A Kalman-based algorithm was used to compute the orientation of each IMMU.	Xsens MVN Studio was used to crop datasets and Microsoft Excel was used to filter the joint angle data values in XML format	Madgwick AHRS orientation filter used to compute orientation from sensor values	A band pass filter (bandwidth 0.25-10Hz) was used to eliminate gravitational acceleration and noise, cutoff frequency of 0.25Hz	Not reported	Custom MATLAB scripts used to extract unfiltered accelerometer data	Not reported	Not reported	Not reported	Data was filtered using a second-order low-pass filter with a cut-off frequency of 10Hz (pelvis) and 20Hz (other segments)	First-order analog filter used to process the output from the three single-axis accelerometers	Not reported	Not reported	Not reported	Not reported	Not reported	Not reported	The accelerometer signal was zero-phase-shift-low-pass filtered using a digital third-order Butterworth filter with a cutoff frequency of 10Hz.	Not reported	Not reported	Accelerometer data from each sensor was RMS transformed to get a measure of dispersion of the data relative to zero'	Data was filtered using a low pass 5th order Butterworth filter with a cutoff frequency of 12Hz	Xsens software (MT Manager 4.2.1, Xsens, The Netherlands) used a Kalman filter to fuse IMMU data	The Madgwick et al. (2011) 9 DOF Altitude and Heading Reference System (AHRS) orientation filter was used in MATLAB	Not reported	3-point filter moving average	Raw data processed offline using system's software written in C# and MATLAB 2012a	Not reported
Kinematic and kinetic variables evaluated from sensor signals (performance indicators)	Ankle dorsiflexion, inversion and internal rotation angles at initial contact, peak during the landing phase, and overall angular displacement	Body sensors - body acceleration, body balance and upper/lower body rotation (roll and pitch angles). wrist sensors - wall-push-off, the wall-turns and the wall-strike events. Swimming velocity. time per stroke. average distance per stroke	Linear foot speed, pelvis velocity, angular velocity (thigh, shank and knee), sagittal plane angles (shank and pelvis in relation to global axes, knee and hip); maximum extension (knee and hip)	Hip angle, knee angle, shank-ski angle, ski-horizontal angle , v-opening angle (The pattern, as well as the maximum, minimum and median values of these angles was calculated)	Shank-thigh angle, thigh-sacrum angle and velocity; Continuous relative phase (CRP; Inter-segment coordination) of the shank-thigh and thigh-sacrum pairs: mean over the entire phase, peaks: the minimum over the entire take-off extension, and the maximum occurring before the minimum described before and their temporal occurrence	CoM position, force and velocity, ski acceleration, somersault angular velocity, total aerodynamic force (using the acceleration of the upper-body)	Range of motion for shoulder (flexion-extension, abduction-adduction, internal-external rotation), elbow (flexion-extension, pronation-supination) and wrist (flexion-extension, radial-ulnar deviation)	External rotation of the left and right hip	Elbow extension angle	Averaged peak plus acceleration value (in x, y and z directions) when blocking the ball	Flexion angle of thumb, index and middle fingers	Vertical ground reaction force from regression equation based on peak vertical accelerations. Mean peak vGRF and total number of strides were calculated for each training session, mean weighted cumulative loading	3D Acceleration and angular velocity, jerk, impact measurement function, kick detection	Femur, thoraco-lumbar and sacrum rotation in the sagittal plane	Acceleration and angular velocities of the upper arm and forearm, 3D trajectory of the elbow, wrist and shoulder	Knee angles (only knee angles used for comparison with gold standard), ankle joint angles (plantar-flexion/dorsiflexion, eversion/inversion, internal/external rotation), normal force of the front (left) and back legs from IMS; foot force from pressure insoles.	Pitching: average peak g-forces at the hand, wrist, forearm, chest and waist; average shoulder internal rotation velocity. Batting: g-forces at the hand, wrist, upper arm and chest; hand velocities	Joint kinematics: range of motion in flexion-extension, abduction-adduction and internal-external rotation for the hip, knee and ankle; Joint forces: in the anterior, up, and medial directions for the hip and anterior, up and lateral direction for the knee. Joint moments: flexion, adduction and external rotation for the hip; flexion, abduction and external rotation for the knee; extension, adduct…	Roll angles (medial-lateral rotation, left/right) :average rotation angles to each side in each swimming lap as well as lap time and stroke rate, stroke counting, counting of sufficient stroke are selected as biofeedback key performance indicators (KPIs)	Elbow torque, arm speed, arm slot, shoulder rotation, ball velocity (collected using a radar gun)	For the shank and thigh: linear and angular acceleration, force during an instep kick for the shank: linear and angular velocity, torque, angular momentum, angular power, angular impulse. leg swing time. Angular acceleration, angular velocity, torque, angular power, angular momentum, and angular impulse were calculated at the instant of impact with the ball. Maximum linear accelerations in three …	Three-dimensional angular velocity and acceleration during Backswing, Downswing, Impact, Follow-through to extrapolate characteristics motion of each region during the different swing phases	Acceleration measurements allowed the characterisation of each phase of the cyclic arm movement (recovery, impact and pushing phases) and the estimation of the angle between the pole axis and the ground during the pushing phase. Different Nordic walking styles were characterised by comparing the timing between the acceleration of each pole. The load cell measured the force along the pole longitud…	Orientation of the rider's pelvis and horse's sternum - anterior-posterior angle (AP; rotation about the mediolateral axis) and lateral angle (LT; rotation about the sagittal axis of the pelvis and rotation about the craniocaudal axis of the trunk)	Left Vertical ground reaction force (vGRF) normalized to Body Weight. From the outside phase (0-50%), mean (vGRFmean) and maximum forces (vGRFmax) were calculated. From the inside phase (50-100%), mean (vGRFmean) and minimum (vGRFmin) forces were calculated. During the edge changing phase (40 -60 %), mean (vGRFmean) and minimum forces (vGRFmin) were calculated. Mean absolute differences of the ou…	Foot center of pressure (COP) mean values of from the outside and the inside phases were calculated, the measurement ranges COPs during the outside and the inside phases were calculated as the maximum value minus the minimum value.	Peak saddle total acceleration on stride before take-off; mean total acceleration for the head and arm during the jump; peak total acceleration at landing for the arm and leg	Acceleration in x direction only from IMU and as obtained from differentiated Vicon positional data	Max hip angle, peak knee flexion at mid-stance and mid-swing, ankle angle at initial contact, center of mass (COM) vertical displacement and COM acceleration. Data extrapolated at 4 stages: 8, 18, 27 and 36 km of the Marathon but only first and last stage data are reported.	Forearm release angle at the moment of ball release	Arm displacement (forward-reverse, left-right, up-down - x, y and z axes) of the string arm and bow arm was calculated by double integration of the acceleration data	Acceleration and angular velocity. 12 statistical features and 3 morphological features : mean and variance from the six axes; the maximum acceleration value from the x-axis and the magnitude of the acceleration and angular velocity composed by the 3-axis acceleration data and the 3-axis angular velocity data.	Angle of the chest and abdomen; recognition of propulsion phase and recovery phase.	Peak positive acceleration of the tibia
Statistical analysis technique	Intraclass correlation coefficients (ICC) and 95% confidence interval used to determine retest reliability and Pearson product-moment correlation coefficients and RMSE used to compare to video-based measurements. Standard error of measurement (SEM) was calculated to obtain an absolute measure of the measurement error in degrees.	Not reported	Statistical Analysis System (version 9.4, SAS 186 Institute, Cary NC) used: general linear mixed-model procedure (Proc Mixed) used to assess concurrent validity of the IMS system with Vicon	Using R-software (version 2.13.): linear mixed model used to test if median values were significant between athletes when divided into two groups. Pearson product-moment correlation coefficient calculated for each angle. Lilliefors test used to assess the normality of the data	Pearson correlation (coefficient = r) used to evaluate the linear relationships between the coordination metrics and the jump lengths on an inter-athlete basis using the data of the 87 jumps. . Lilliefors test used to test for normality	The Lilliefors test was used to verify the normality of the data. The Pearson product-moment correlation coefficient was used to calculate the correlation between the normalized distance and dynamic features extracted. Unpaired t-test compared different features between Group 1 and Group 2.	Using R-software: Coefficient of multiple correlation (CMC) values, Pearson product-moment correlation coefficient (R) and RMSE, percentage ratio between RMSE and relevant range of motion (rRMSE) were used to compare measurements obtained by the IMMUs and a stereo-photogrammetric system	Pearson product-moment correlation coefficient was calculated to compare hip rotation asymmetry between data captures and paired t-tests to compare trot rising on each rein	Minimum and typical RMSE and SE values calculated for each sensor with respect to a reference		Not reported	Independent sample t-tests (significance set at p < 0.05) to compare injured/uninjured participants	Not reported	to determine accuracy the mean average error and standard deviation of the angles between those calculated using the system presented and the BTS were calculated	Correlation coefficient, root mean square of error and a correlation equation between the 3D sensor and motion capture system were derived to evaluate the effectiveness of the method	RMSE of bilateral insole measurement system was calculated	Not reported	Not reported	Not reported	Program R used to asses difference in error number among pitch types (general linear models); assess influence of pitch type (mixed-effect models). Multiple regression analysis also performed to determine the variables that most significantly predicted elbow torque and other parameters	SPSS software (SPSS, Chicago, Illinois) used to test for normality (Shapiro-Wilk's test), skewness and kurtosis, independent sample t-tests to compare differences between legs	Not reported	Not reported	The inter-trial repeatability was evaluated by calculating the coefficient of multiple correlation between angle-time courses of the pelvis and sternum. T-tests and Mann-Whitney U-test were used to test for significant differences in range of motion of AP and LT angles between the two riders	SPSS v.18 software (SPSS, Chicago, IL) was used to perform statistical analysis. Repeated measures ANOVA were calculated 2 (Expert, Intermediate)×(2 systems, 2 skiing modes, 2 pitches) for global significance and to find the main effects of pitch, skier’s levels and skiing modes on the variable of absolute difference (PI-FP). Bonferroni-adjusted paired-sample t-test as post-hoc analysis.	coefficient of similarity. A three-way repeated measures ANOVA was calculated to determine the effect of the within-subject factors measurement system (‘‘system’’), skiing mode, pitch and skier skill level. A Bonferroni-adjusted paired-sample t test was used as a post hoc test.	Not reported	Pearson's test used to compare acceleration data between the IMU and Vicon	Repeated measures one way ANOVAs and Tukey post-hoc test used to analyze mean differences between kinematic parameters at defined stages of the marathon	A Pearson's correlation was used to measure the linear dependence between wearing or not wearing an IMU sensor'. Bland-Altman analysis used to find the combined percentage error between the IMU and Vicon	Not reported	Principal component analysis and SUPPORT VECTOR MACHINE, k-Nearest-Neighbor (kNN) non- parametric classifier and Naïve Bayes (NB) classifier to classify players based on their skill levels	Not reported	One-way ANOVA with repeated measures to determine whether there was a significant difference between baseline measures and the other conditions. Paired t-tests were used to compared PPA magnitudes
Reliability/ evaluation	design criteria for good test-retest reliability was not supported (ICC>0.80); sagittal plane ICCS were fair to good and similar to motion analysis results (r=0.90-0.98 and RMSE<5°); frontal and transverse plane data were not valid (r<0.562 and RMSE>3°). The MARG accuracy was previously assessed with < .8° static RMSE and < 1.7° dynamic RMSE.	Not reported	Measurement errors between IMS and Vicon ranged from 0.1-5.8%. Measurement errors within the IMS ranged from 1.7-15.4%. Good concurrent validity of IMS to Vicon	Validity of system assessed by comparing ski horizontal angle at landing impact to hill slope: -0.2±4.8°; max value 11.5°. When compared to literature data differences were smaller than 6° for 75% of the angles and smaller than 15° for 90% of the angles.	Mean CRP correlation coefficient for shank-thigh r = -0.41 (significant correlation with jump length) and thigh-sacrum r = -0.05 (small correlation)	Results consistent with data in the literature (Arndt et al., 1995; Sasaki, Tsunoda, & Koike, 2005; Schmölzer & Müller, 2002; Virmavirta, Kivekäs, & Komi, 2001; Virmavirta & Komi, 1993). Such as maximum CoM velocity: Group 1 = 2.51 ± 0.83 m/s, Group 2 = 2.23 ± 0.28 m/s, Literature = 2.3 m/s (Virmavirta et al., 2001).Significant trends found between both groups for resulting force acting on CoM, a…	Better agreement between the IMMUs and stereo-photogrammetric system for breaststroke than front crawl: CMC=0.99 compared to 0.97, R=0.99 compared to 0.95 and RMSE=5° compared to 7°.R and rRMSE showed median values generally higher than 0.91, and lower than 11%, respectively in simulated front crawl. R and rRMSE showed median values higher than 0.93 and lower than 9%, respectively in simulated br…	The sensors used provided 3-dimensional orientation accuracy found to be within 1º from a literature study. There was a strong correlation between the two means for both trot rising on the left rein, r(10) = .981, p < .01; and trot rising on the right rein, r(10) = .961, p <.01. small significant difference between the mean hip rotation asymmetry for trot rising on the left rein, t(11) = 3.722, p…	Best achieved RMSE was 2° in a dynamic condition, with typical values around 7° - indicating that the calibration of the system needs to be improved		Able to differentiate between forehand and backhand, able to identify other grips with up to 60% detection. 70% detection ability		For a total of 450 kicks, only 6 kicks were not detected…4 of them are due to sensor errors and the others are caused by failure in recognition of leg swings…there is one false detection, in which the end of a leg swing was mistaken as ball-foot contact'	Average error of 4.0°, 4.1° and 3.6° for the thoraco-lumbar junction, sacrum and femur respectively	Estimation error of about 10% compared to a motion capture system (Vicon). RMS of error ranged from 0.13m to 0.39m for the conventional method and 0.09m to 0.18m for the application of estimation method of spatial relation. R values (correlation coefficient) ranged from 0.24 to 0.40 and 0.73 to 0.97 for the conventional method and estimation method respectively	Deviation of IMS from optical video-based system: left leg 4.8±0.3°, right leg 3.1±1.7°; high correlation coefficients (left knee angle r=0.96, right knee angle r=0.77); bilateral insoles have limited accuracy with a mean RSME of 28±6.6%. No differences in the measured angles between the IMS and the combined usage with a DGPS system.	In pitching, there was no statistical difference between the average shoulder internal rotation velocity measured by the two systems. The average standard deviation of the IMUs were around 6% compared to 15% for the optical system. During batting the average error for the bat speed at the time of impact was 4.8 ± 0.5 %.	The joint angle trends in short- and middle-turns were generally similar, although the mean joint flexion angles in hip and knee joints for middle-turn were approximately 10° -6° less than those for short-turn. The joint forces and moments for middle-turn were higher than those for short-turn.	Average difference between stopwatch and ”ISWIM” is 0.56 s. All the swimmers increase their SR after being provided with vibratory biofeedback.	Device was able to accurately detect 97.4% of pitches thrown by a given player. For throwing balls, the device accurately measured and recorded the data in 96.9% of pitches, compared with 96.9% for curve balls and 97.9% for change ups. The device was sensitive enough to distinguish pitches according to elbow torque, arm speed, arm slot, and shoulder rotation.	Angular velocity (X-axis) of the shank results are comparable with widely accepted report on angular velocity of the leg: 1911.2±241.6°/s compared to 2257±2246°/s reported by Nunome et al. (2006).	There are clear differences between sensor data from beginner and experienced players which can help improve the performance of beginners	The system was able to caputre the relevant dynamics of the pole movement at a sampling rate of 50Hz and GPS allowed the synchronisation of the sensors on each pole. The measured quantites weer comparable with data reported in literature and obtained by indoor equipment.	Repeatability between trials for AP and LT were found to be moderate to excellent, with an average CMC of 0.88 (±0.05) for the sternum and 0.88 (±0.07) for the pelvis. Inter-individual differences were found for AP and LT angles in sitting trot (13.3° ± 2.3° and 6.4° ± 1.1° respectively), corresponding well with values in literature (13.9° ± 2.2° and 5.1° ± 1.1° reported by Byström et al. (2009))	Mean relative differences of vGRF measured by PI system compared to a portable force plate were 29.3-42.8% (PI generally reported lower values p < 0.01). The mean absolute difference of the vGRFmean between the two systems ranged from -0.45 to -0.23 N/BW on the outside leg and from -0.19 to -0.10 N/BW on the inside leg, and during edge changing phase ranged from -0.25 to 0.13 N/BW. The difference…	The COP values in the x direction were significantly different to the FAP values determined by the force plate system - the similarity coefficient for the outside phase ranged from -0.95 to 0.26 and from -0.53 to 0.40 for the inside phase. There were no significant differences in the y direction - the similarity coefficient for the outside phase ranged from 0.92-0.96 and from 0.15 to 0.78 for the…	Data shows that the position of novice riders during jumps is more unbalanced - increased head and arm movement on the inexperienced horse. Movements of riders were similar on the experienced horse	Correlation coefficient of 0.907±0.068 for the Pearson's test between IMU and Vicon. The differences in acceleration recorded by the Vicon and IMU recorded results in a mean accuracy of 1.81 m/s² across each of the trials. The timing accuracy of the inertial measurement unit was accurate to 0.025 ± 0.024 s.	Kinematic changes were found over the course of the marathon for all runners such as decrease in peak knee flexion midstance (45.15 ± 2.19° at 8km and 39.99 ± 1.33° for Runner 1). Peak COM acceleration increased throughout the marathon for all runners, possibly indicating higher loading raters.	The IMU overestimated the forearm release angle by 4.03±1.58% compared to Vicon (gold standard reference)	Differentiate movement patterns in relation to the score given - 'a high bow arm's movement in transverse plane my lead to a lower score' as well as a longer time taken in the aiming phase	Average accuracy of 94% in assessing difference in skill levels using the built classifiers	The monitoring system was 'able to segment human motion phases automatically using the SVM classifier as the motion detection algorithm'	Providing real-time audio biofeedback enabled runners to significantly decrease their PPAs after just five minutes during treadmill running
									1
